# Supplementary material for: Comparison of ground-based and satellite measurements of water vapour vertical profiles over Ellesmere Island, Nunavut
Source: Copernicus journal article supplement (doi:10.5194/amt-2018-267), 2018-10-08
Supplement: Supplementary file 1 [file amt-2018-267-supplement.zip]

| Instrument<br>(retrieval version) | Altitude<br>[km] | N      | mean difference<br>$\pm$ SEM [ppmv] | $\sigma$<br>[ppmv] | mean difference<br>$\pm$ SEM [%] | $\sigma$<br>[%] |
|-----------------------------------|------------------|--------|-------------------------------------|--------------------|----------------------------------|-----------------|
| ACE-FTS<br>(v3.6)                 | 6.4              | 48     | $-14.2 \pm 5.6$                     | 38.7               | $-7.6 \pm 4.7$                   | 32.3            |
|                                   | 8.0              | 129    | $-2.1 \pm 1.8$                      | 19.9               | $+0.0 \pm 4.3$                   | 49.2            |
|                                   | 9.8              | 170    | $-0.2 \pm 0.3$                      | 3.8                | $+0.0 \pm 2.7$                   | 35.1            |
|                                   | 12.0             | 193    | $+0.2 \pm 0.1$                      | 1.0                | $+4.5 \pm 1.8$                   | 25.8            |
| ACE-MAESTRO<br>(v30)              | 6.4              | 45     | $-38.3 \pm 13.2$                    | 88.9               | $-21.8 \pm 12.8$                 | 86.1            |
|                                   | 8.0              | 54     | $-14.5 \pm 5.4$                     | 39.8               | $-17.25 \pm 13.3$                | 98.0            |
|                                   | 9.8              | 62     | $-3.9 \pm 1.1$                      | 8.9                | $-20.9 \pm 79.8$                 | 79.8            |
|                                   | 12.0             | 65     | $-1.0 \pm 0.2$                      | 2.0                | $-19.1 \pm 6.7$                  | 54.0            |
| AIRS<br>(v6)                      | 3.0              | 59430  | $-115.3 \pm 1.3$                    | 327.5              | $-6.4 \pm 0.1$                   | 29.5            |
|                                   | 6.4              | 123776 | $-10.9 \pm 0.3$                     | 103.8              | $-2.4 \pm 0.1$                   | 42.1            |
|                                   | 8.0              | 194619 | $-11.2 \pm 0.1$                     | 56.7               | $-3.0 \pm 0.1$                   | 38.0            |
|                                   | 9.8              | 349484 | $-3.2 \pm 0.0$                      | 12.2               | $-4.3 \pm 0.0$                   | 32.1            |
|                                   | 12.0             | 385786 | $-0.2 \pm 0.0$                      | 1.9                | $-1.1 \pm 0.0$                   | 24.1            |
| MIPAS<br>(IMK v5)                 | 6.4              | 72     | $-38.1 \pm 6.5$                     | 55.1               | $-25.6 \pm 3.6$                  | 30.7            |
|                                   | 8.0              | 291    | $-17.4 \pm 2.3$                     | 38.9               | $-20.6 \pm 1.7$                  | 28.5            |
|                                   | 9.8              | 2169   | $-3.9 \pm 0.2$                      | 10.1               | $-9.8 \pm 0.6$                   | 30.2            |
|                                   | 12.0             | 3291   | $-0.3 \pm 0.0$                      | 1.9                | $-1.2 \pm 0.4$                   | 23.6            |
| MIPAS<br>(IMK v7)                 | 6.4              | 95     | $-48.3 \pm 6.3$                     | 61.2               | $-29.3 \pm 2.9$                  | 28.0            |
|                                   | 8.0              | 299    | $-18.6 \pm 2.3$                     | 39.6               | $-21.5 \pm 1.6$                  | 28.2            |
|                                   | 9.8              | 2278   | $-4.2 \pm 0.2$                      | 10.5               | $-10.0 \pm 0.6$                  | 30.0            |
|                                   | 12.0             | 3306   | $-0.3 \pm 0.0$                      | 1.9                | $-1.1 \pm 0.4$                   | 23.7            |
| MLS<br>(v4.2)                     | 8.0              | 88     | $-13.3 \pm 1.0$                     | 9.5                | $-31.3 \pm 1.3$                  | 12.0            |
|                                   | 9.8              | 25467  | $-5.0 \pm 0.1$                      | 12.0               | $-12.6 \pm 0.2$                  | 29.6            |
|                                   | 12.0             | 25475  | $-0.5 \pm 0.0$                      | 1.9                | $-4.9 \pm 0.1$                   | 22.8            |
| SCIAMACHY<br>(IUP v3.01)          | 12.0             | 1520   | $-0.3 \pm 0.0$                      | 1.8                | $-3.8 \pm 0.7$                   | 26.8            |
| SCIAMACHY<br>(IUP v4.2)           | 12.0             | 11735  | $-0.3 \pm 0.0$                      | 1.4                | $-5.2 \pm 0.2$                   | 21.8            |
| TES<br>(v6)                       | 3.0              | 3218   | $-35.9 \pm 16.1$                    | 913.6              | $+4.2 \pm 0.8$                   | 42.6            |
|                                   | 6.4              | 3218   | $+86.4 \pm 5.2$                     | 292.5              | $+27.2 \pm 1.2$                  | 67.2            |
|                                   | 8.0              | 3218   | $+34.3 \pm 2.0$                     | 112.8              | $+29.0 \pm 1.2$                  | 66.4            |
|                                   | 9.8              | 3218   | $+6.9 \pm 0.4$                      | 20.5               | $+26.0 \pm 0.9$                  | 53.6            |
|                                   | 12.0             | 3218   | $+1.5 \pm 0.0$                      | 3.1                | $+22.8 \pm 0.6$                  | 36.3            |
