# Supplementary material for: Comparison of ground-based and satellite measurements of water vapour vertical profiles over Ellesmere Island, Nunavut
Source: Copernicus journal article supplement (doi:10.5194/amt-2018-267), 2018-10-08
Supplement: Supplementary file 2 [file amt-2018-267-supplement.zip]

| Instrument<br>(retrieval version) | Altitude<br>[km] | N      | mean<br>difference $\pm$<br>SEM [ppmv] | $\sigma$<br>[ppmv] | mean<br>difference $\pm$<br>SEM [%] | $\sigma$<br>[%] |
|-----------------------------------|------------------|--------|----------------------------------------|--------------------|-------------------------------------|-----------------|
| ACE-FTS<br>(v3.6)                 | 6.0              | 62     | $-8.9 \pm 12.0$                        | 94.8               | $+29.2 \pm 10.7$                    | 84.6            |
|                                   | 8.0              | 103    | $+0.3 \pm 3.4$                         | 34.6               | $+3.5 \pm 7.4$                      | 75.7            |
|                                   | 10.0             | 60     | $-5.0 \pm 1.7$                         | 13.1               | $-9.8 \pm 6.0$                      | 46.3            |
|                                   | 12.0             | 22     | $+1.2 \pm 0.3$                         | 1.5                | $+32.4 \pm 5.9$                     | 27.8            |
| ACE-MAESTRO<br>(v30)              | 6.0              | 62     | $-56.1 \pm 32.3$                       | 254.7              | $+27.0 \pm 24.8$                    | 171.2           |
|                                   | 8.0              | 100    | $-13.3 \pm 8.1$                        | 80.8               | $-4.3 \pm 9.0$                      | 90.0            |
|                                   | 10.0             | 43     | $-2.0 \pm 3.1$                         | 20.2               | $-4.8 \pm 10.5$                     | 68.9            |
|                                   | 12.0             | 13     | $-1.1 \pm 0.6$                         | 2.0                | $-30.7 \pm 11.0$                    | 39.7            |
| AIRS<br>(v6)                      | 3.0              | 72491  | $-72.9 \pm 1.8$                        | 478.4              | $+6.4 \pm 0.2$                      | 56.0            |
|                                   | 6.0              | 182139 | $-12.9 \pm 0.3$                        | 118.8              | $+10.3 \pm 0.1$                     | 61.7            |
|                                   | 8.0              | 246376 | $+3.5 \pm 0.1$                         | 47.7               | $+16.4 \pm 0.1$                     | 51.5            |
|                                   | 10.0             | 40752  | $-8.4 \pm 0.0$                         | 17.5               | $-9.3 \pm 0.1$                      | 30.9            |
|                                   | 12.0             | 9476   | $-2.0 \pm 0.1$                         | 9.2                | $+6.9 \pm 0.3$                      | 30.3            |
| MLS<br>(v4.2)                     | 8.0              | 136    | $-29.1 \pm 8.0$                        | 93.4               | $-18.5 \pm 4.5$                     | 52.0            |
|                                   | 10.0             | 6164   | $-7.4 \pm 0.3$                         | 26.3               | $-27.1 \pm 0.4$                     | 33.7            |
|                                   | 12.0             | 683    | $-2.7 \pm 0.3$                         | 9.0                | $-6.1 \pm 1.0$                      | 27.1            |
