# Supplementary figures and images for: Comparison of ground-based and satellite measurements of water vapour vertical profiles over Ellesmere Island, Nunavut
Source: Copernicus journal article supplement (doi:10.5194/amt-2018-267), 2018-10-08

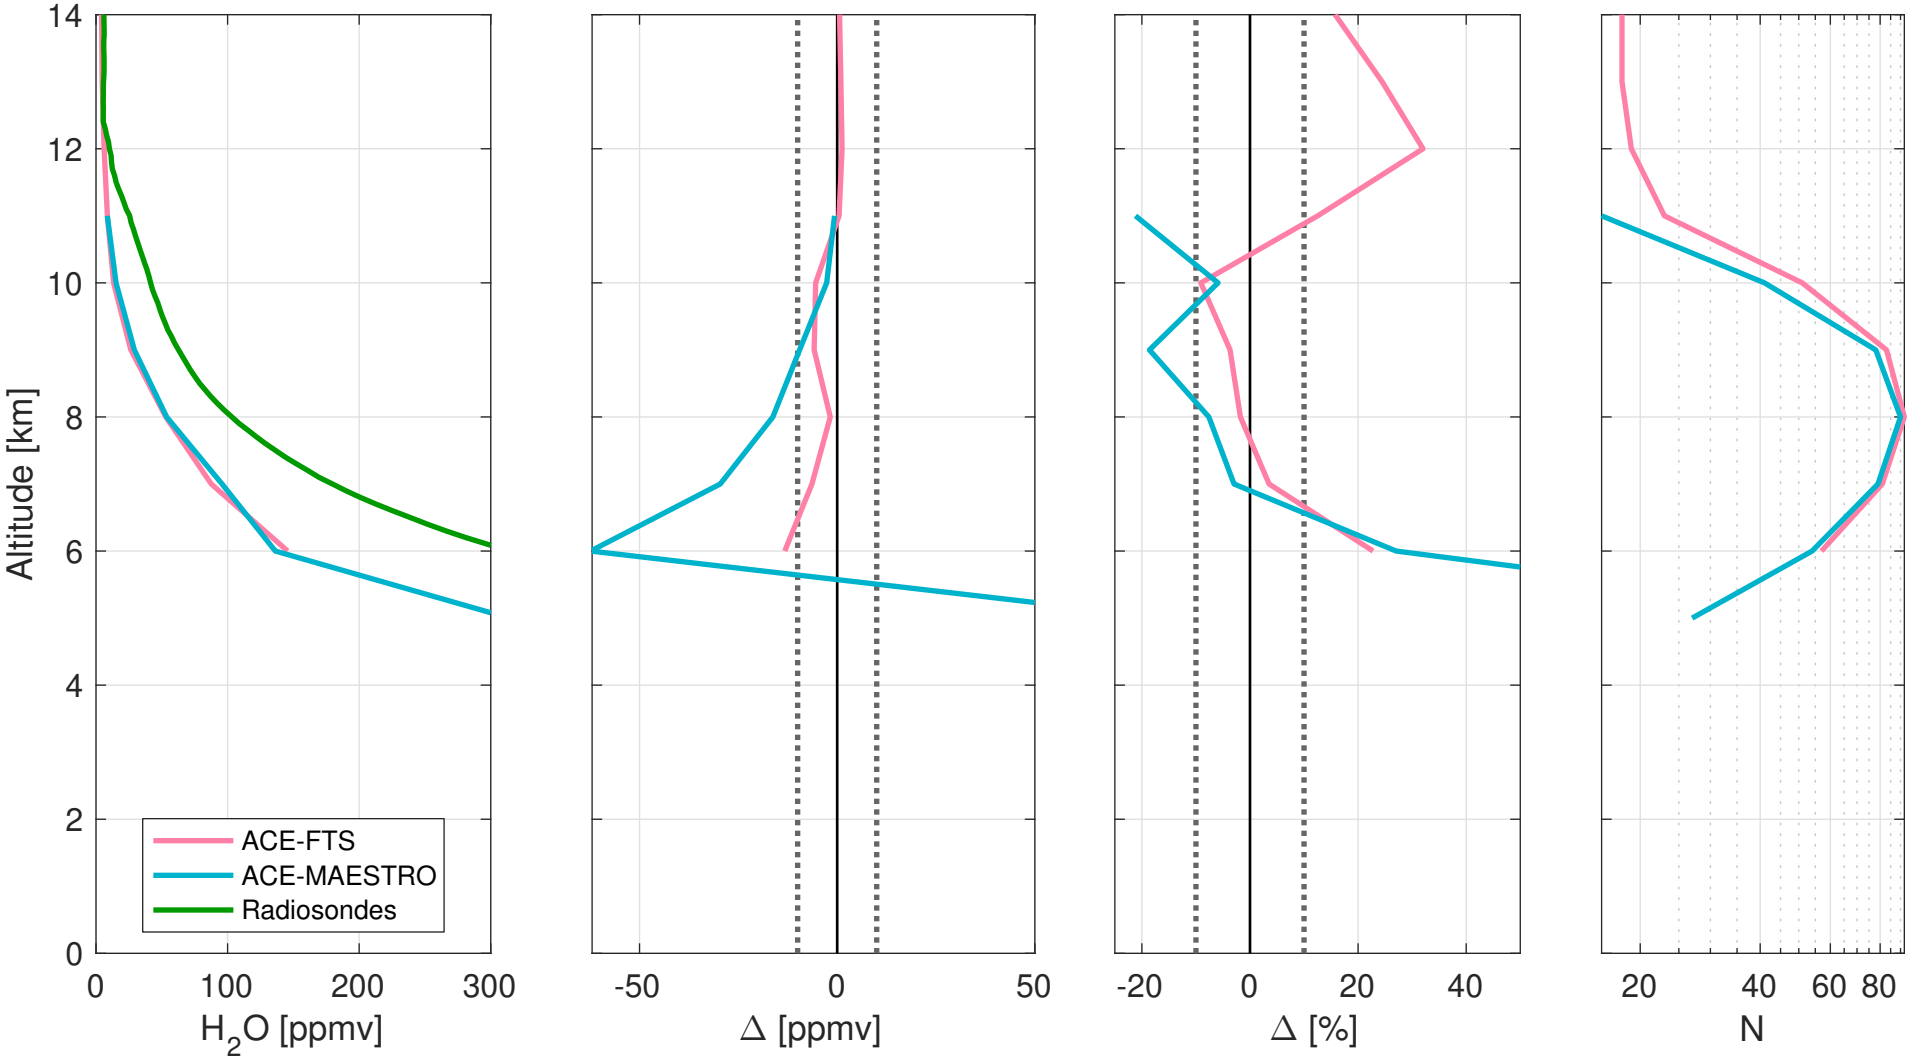

Supplement: Supplementary file 3 [file amt-2018-267-supplement.zip]

**z = 6 km**

(a)

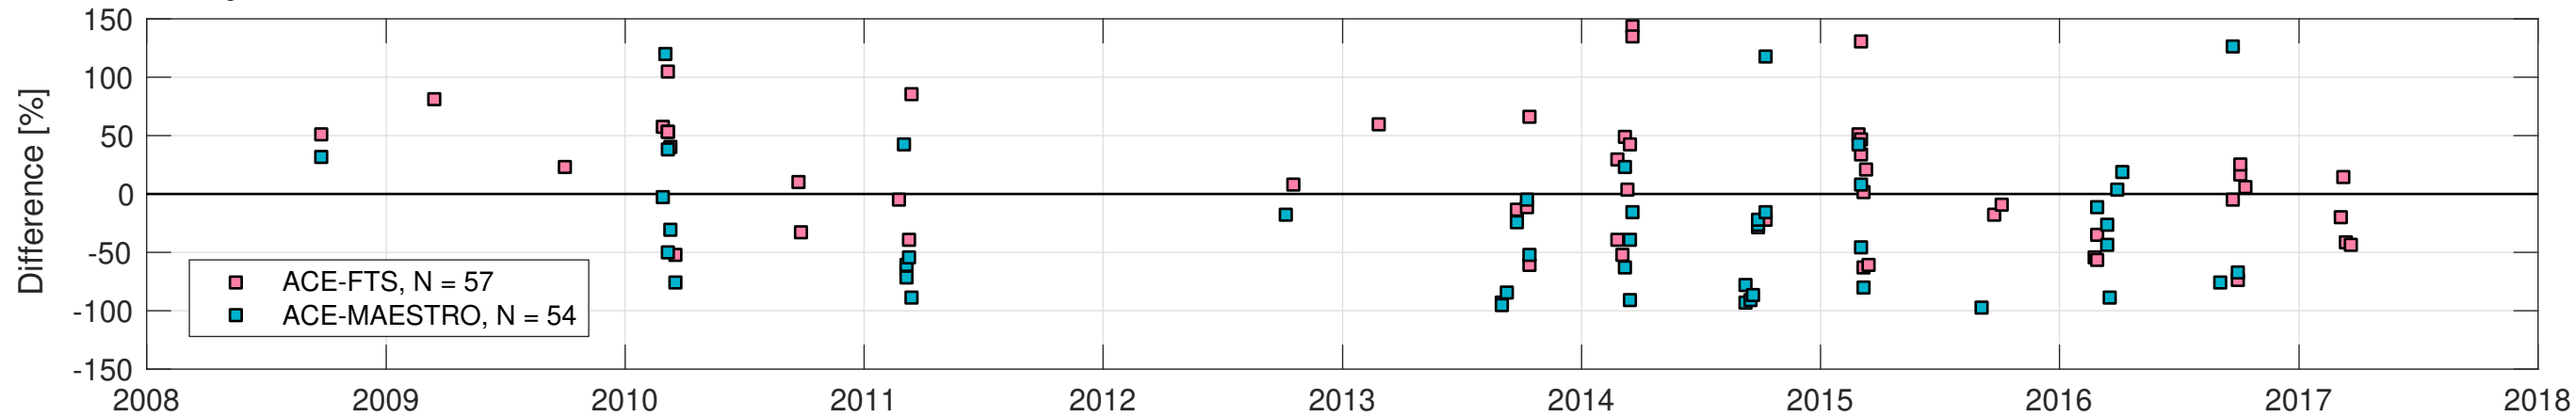

(b)

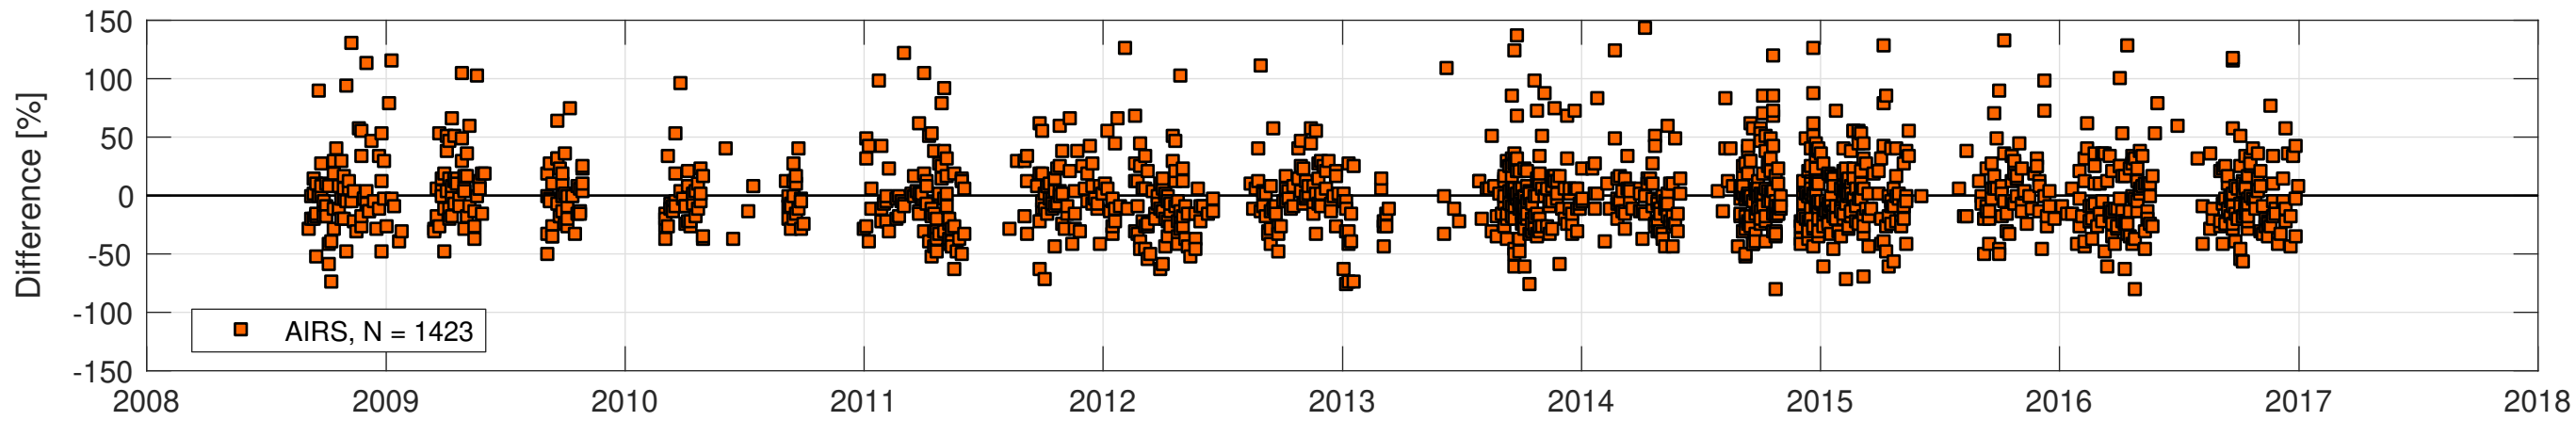

Supplement: Supplementary file 4 [file amt-2018-267-supplement.zip]

**z = 8 km**

(a)

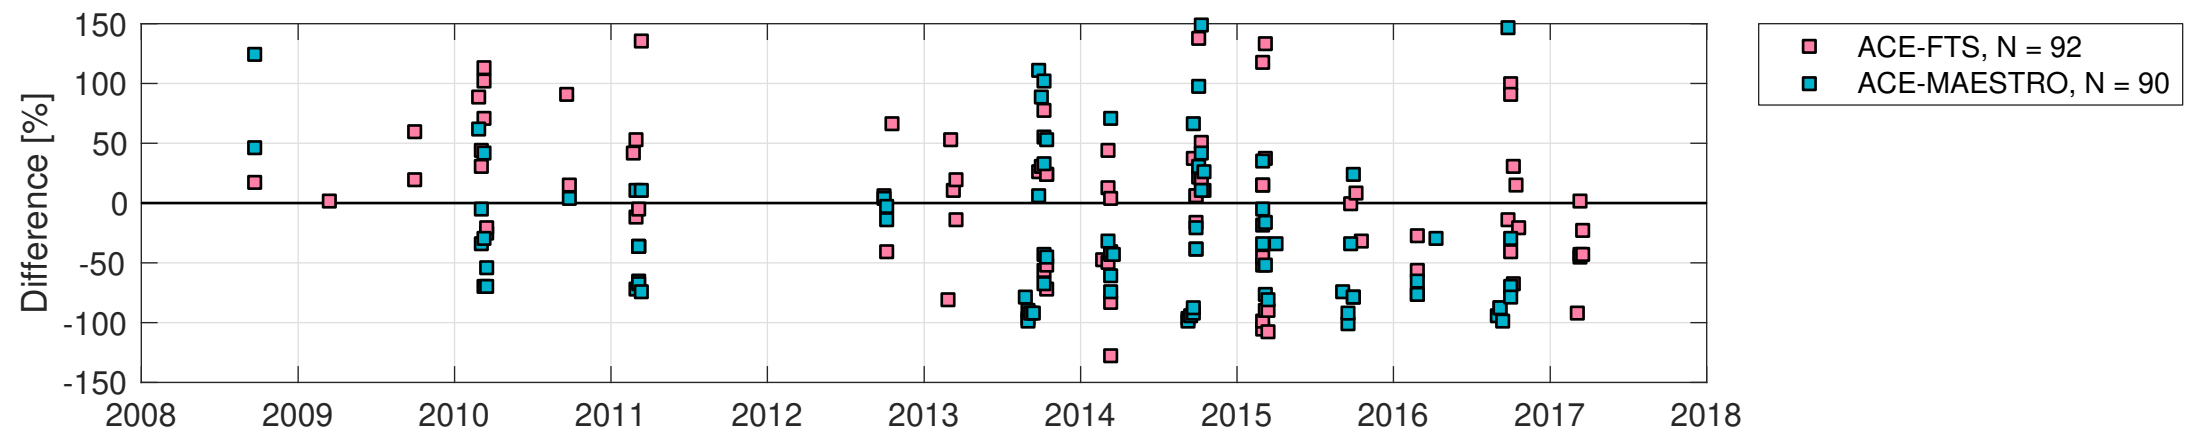

(b)

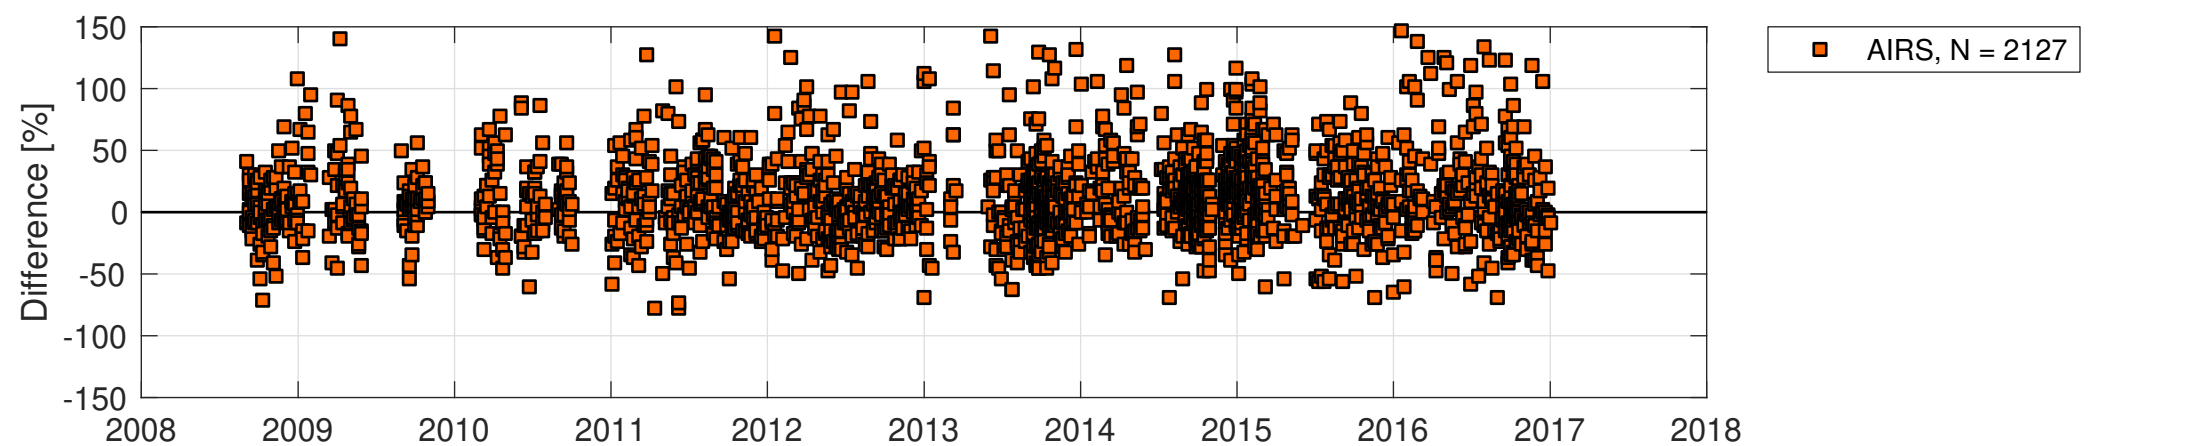

(c)

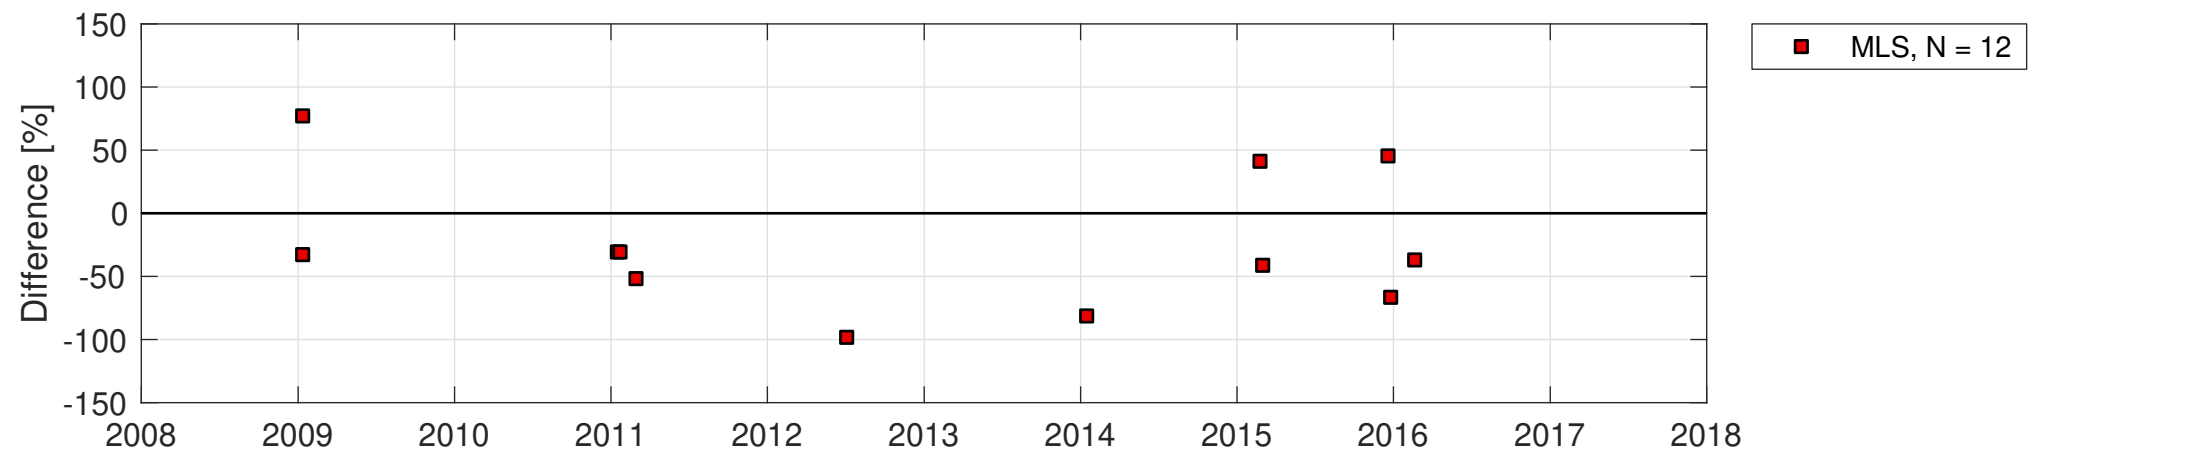

Supplement: Supplementary file 5 [file amt-2018-267-supplement.zip]

**z = 12 km**

(a)

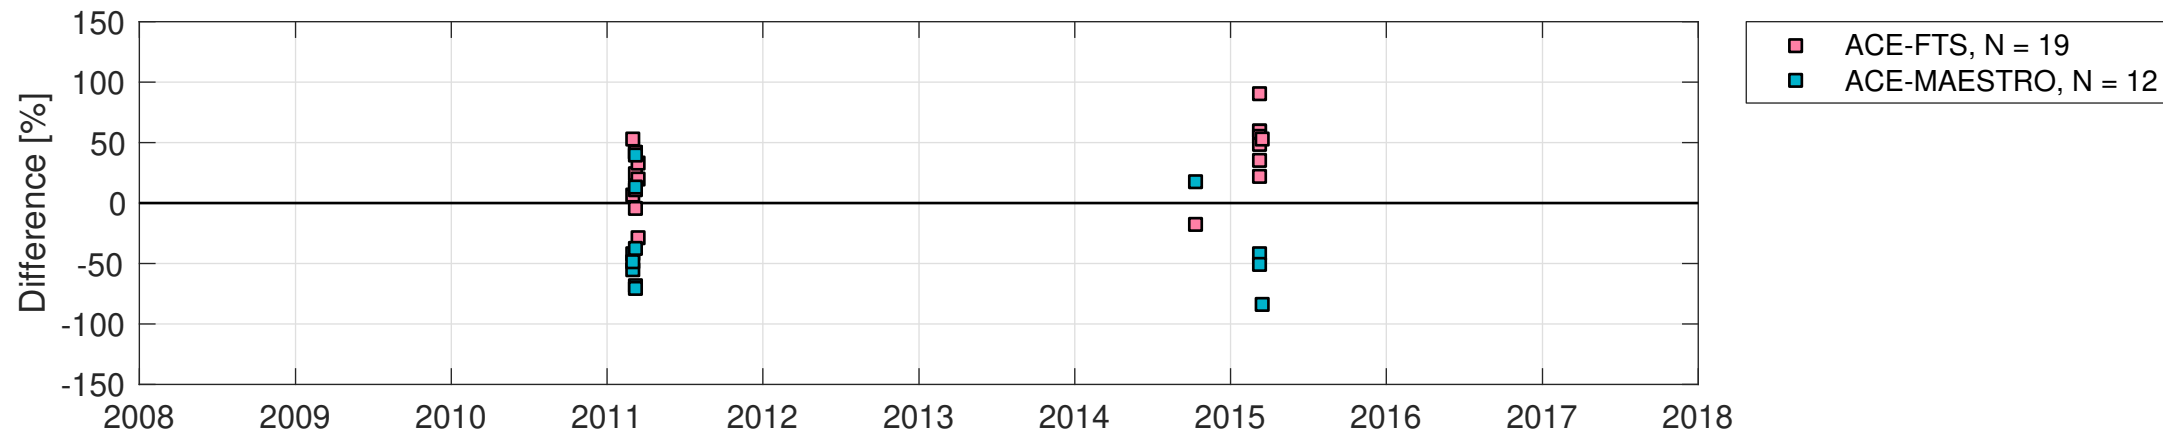

(b)

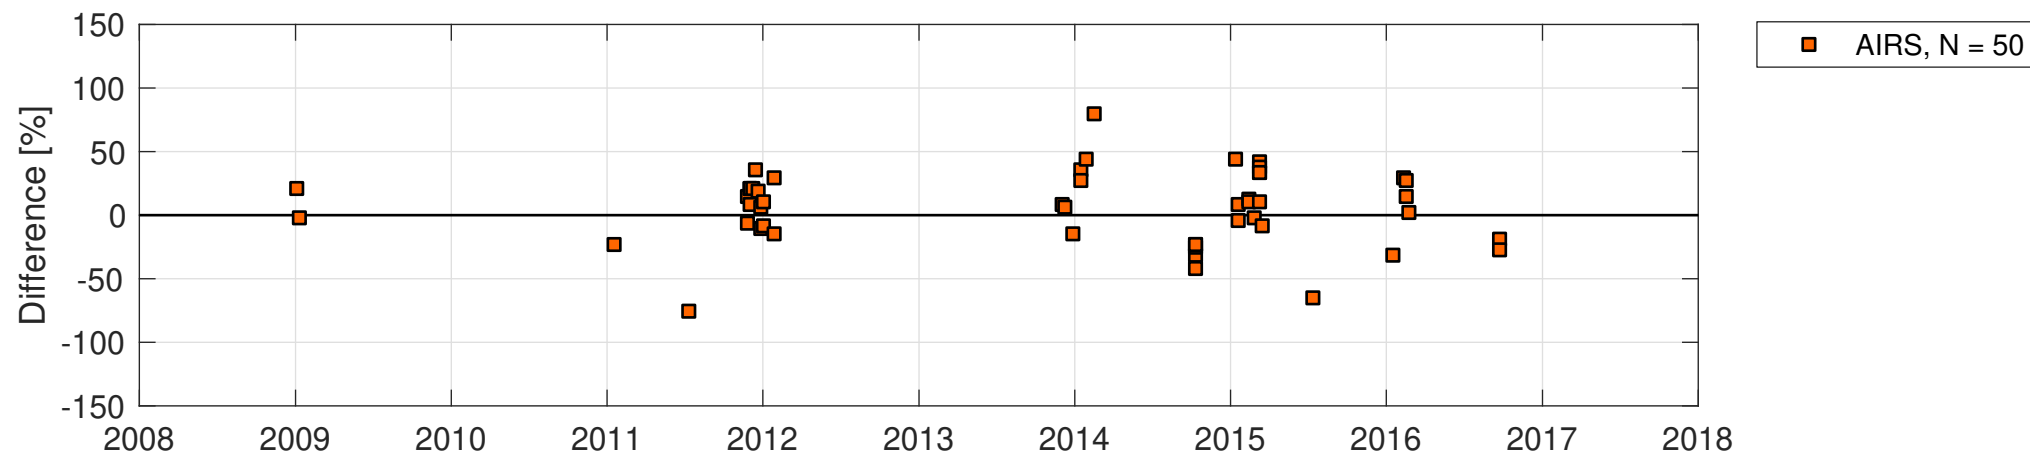

(c)

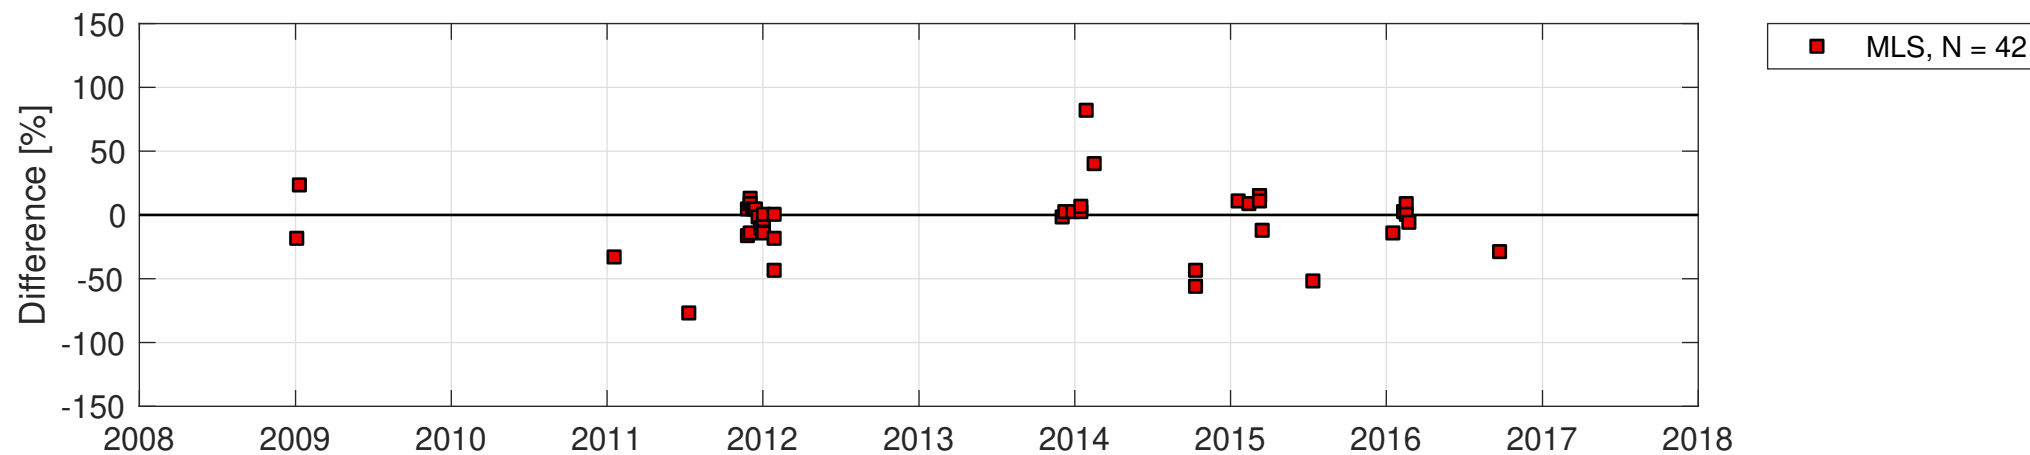

Supplement: Supplementary file 6 [file amt-2018-267-supplement.zip]

**z = 8.0 km**

(a)

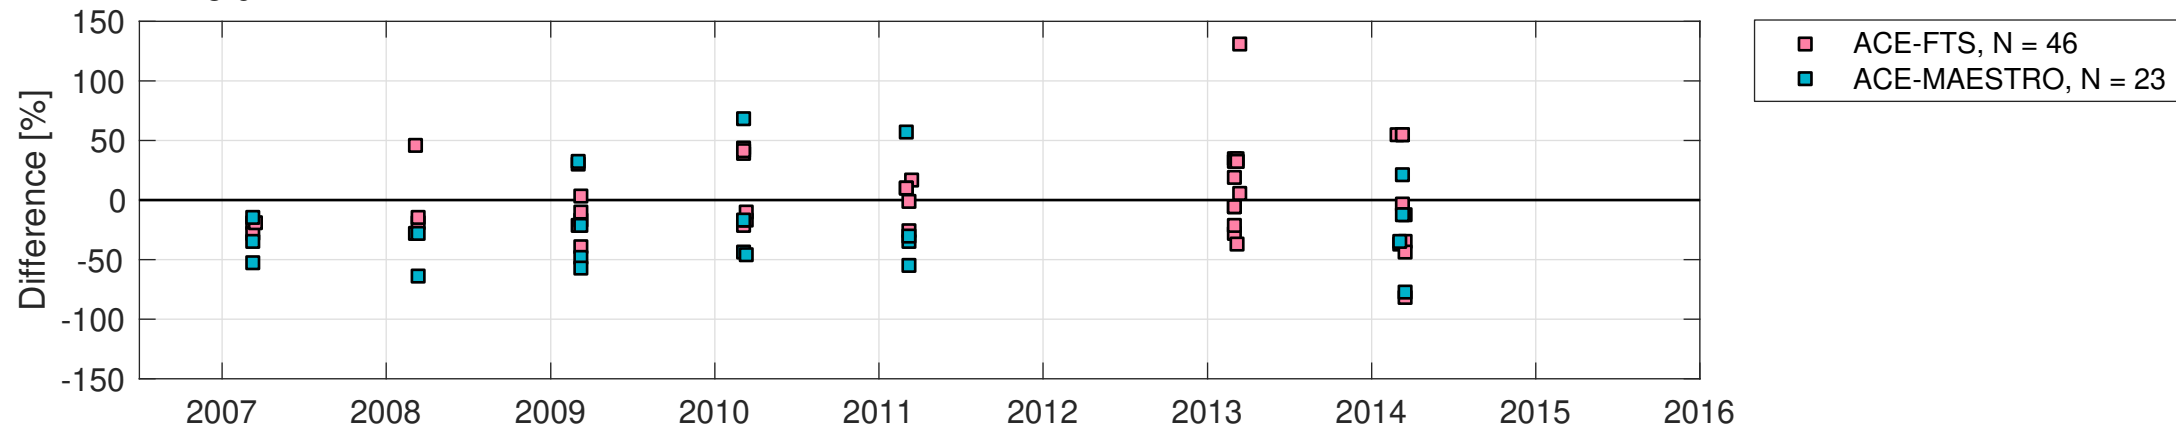

(b)

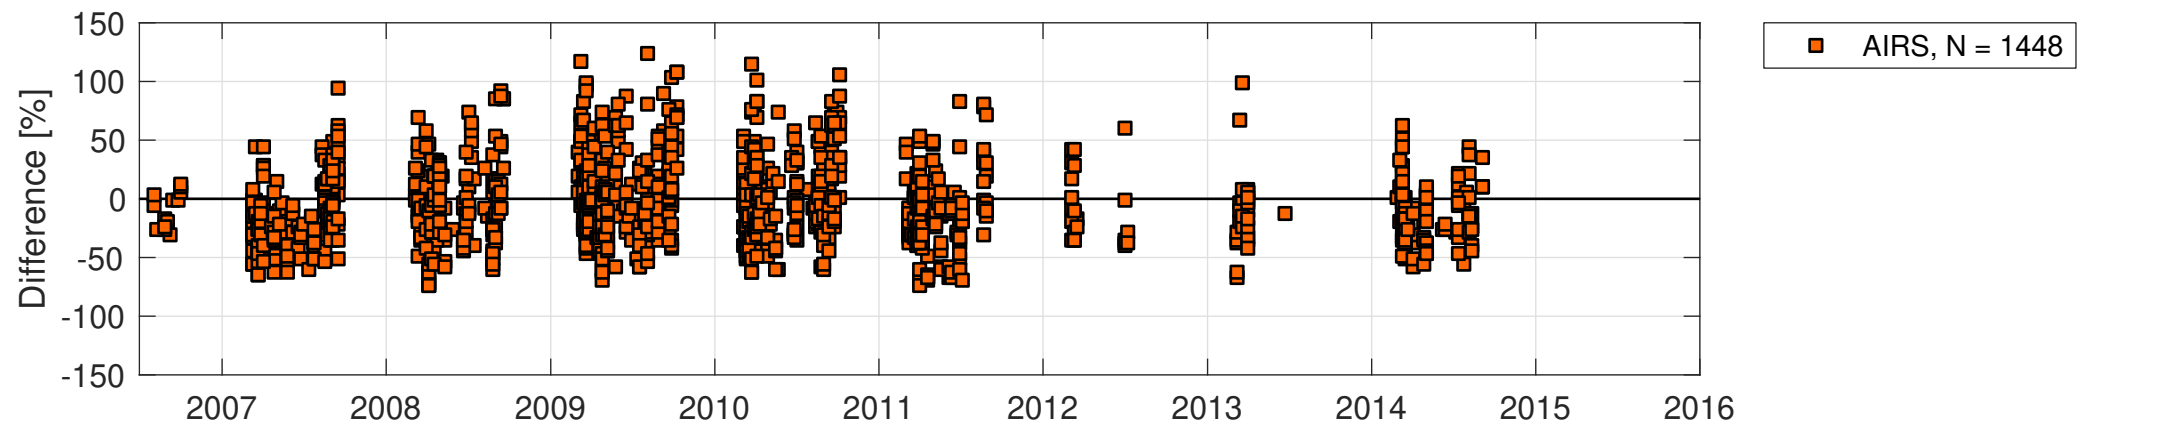

(c)

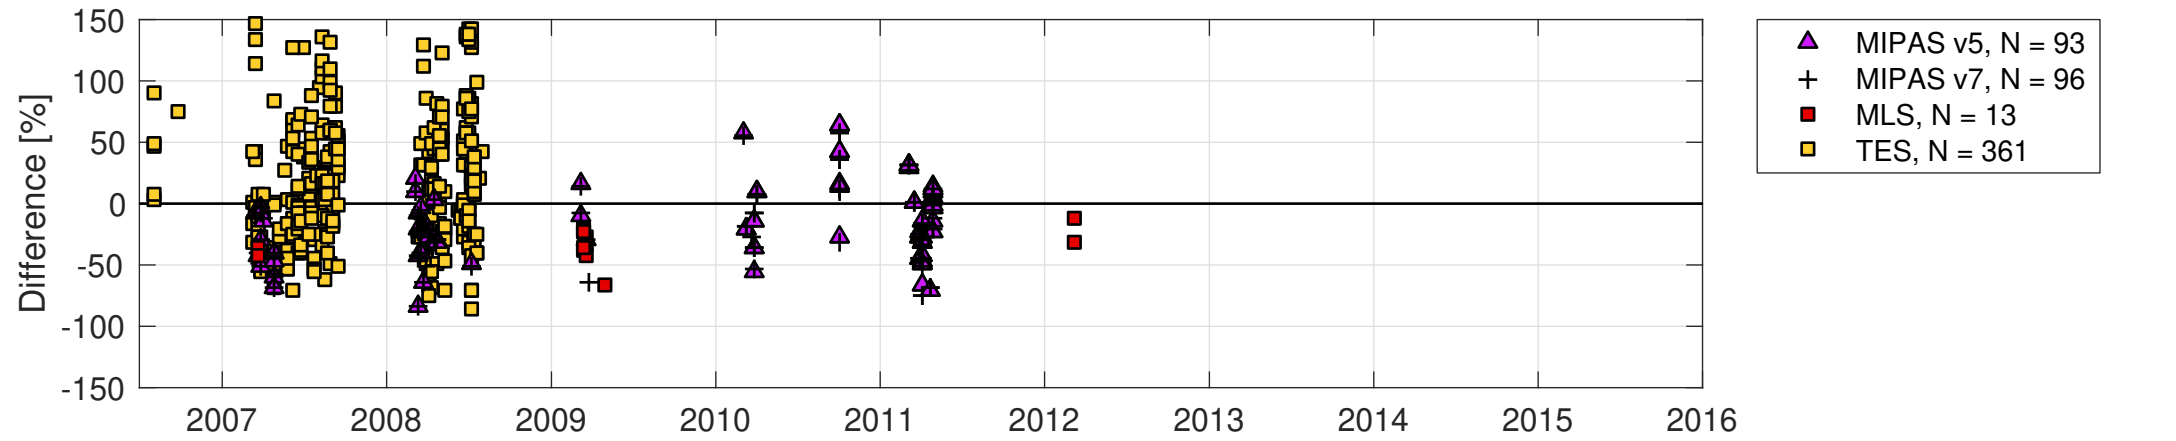

Supplement: Supplementary file 7 [file amt-2018-267-supplement.zip]
